# Supplementary material for: Degradable silk-based soft actuators with magnetic responsiveness
Source: Royal Society of Chemistry journal article supplement (doi:10.1039/d2tb01328b), 2022-01-01
Supplement: d2tb01328b1.pdf [file d2tb01328b1.pdf]

## Supporting information

### Degradable silk-based soft actuator with magnetic responsiveness

Niping Deng<sup>1,2</sup>, Jinghang Li<sup>2</sup>, Hao lyu<sup>2</sup>, Ruochuan huang<sup>2</sup>, Haoran Liu<sup>2</sup>, Chengchen Guo<sup>2,3\*</sup>

<sup>1</sup> School of Materials Science and Engineering, Zhejiang University, Hangzhou 310027, China

<sup>2</sup> School of Engineering, Westlake University, Hangzhou 310024, China

<sup>3</sup> Westlake Laboratory of Life Sciences and Biomedicine, Hangzhou 310024, China

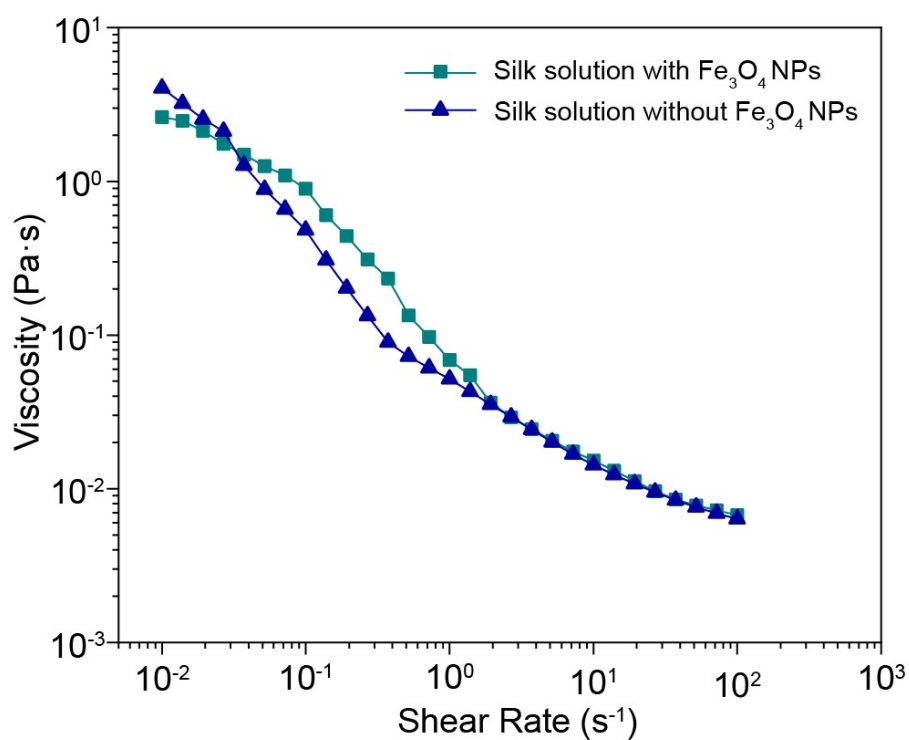

**Fig. S1** Viscosity-shear rate profiles of silk solutions with or without magnetic Fe<sub>3</sub>O<sub>4</sub> NPs.

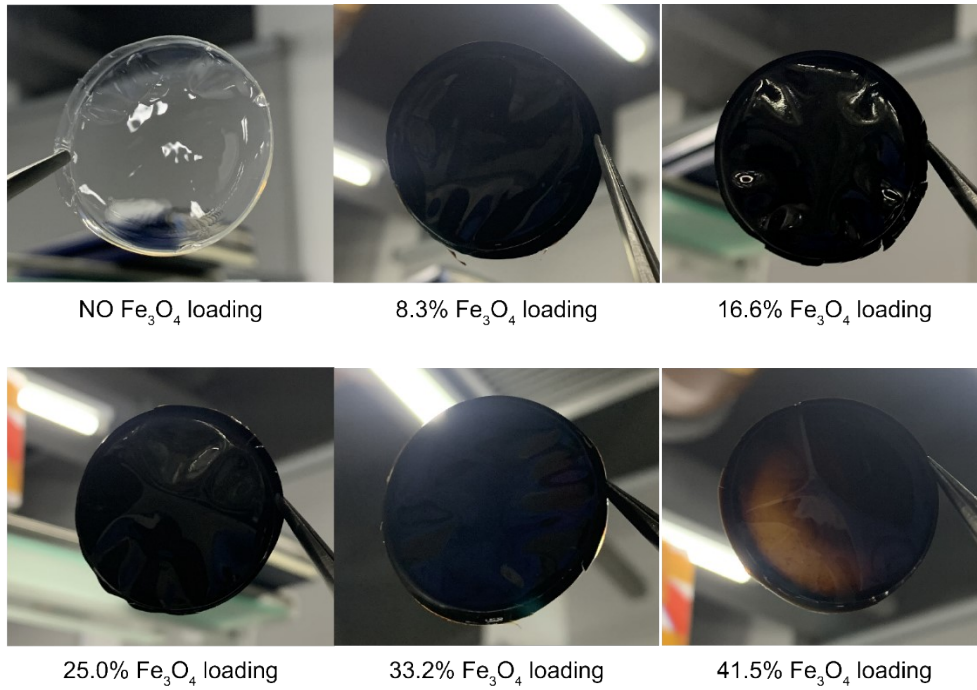

**Fig. S2** The photographs of magnetic silk films with different Fe<sub>3</sub>O<sub>4</sub> NPs loading percent.

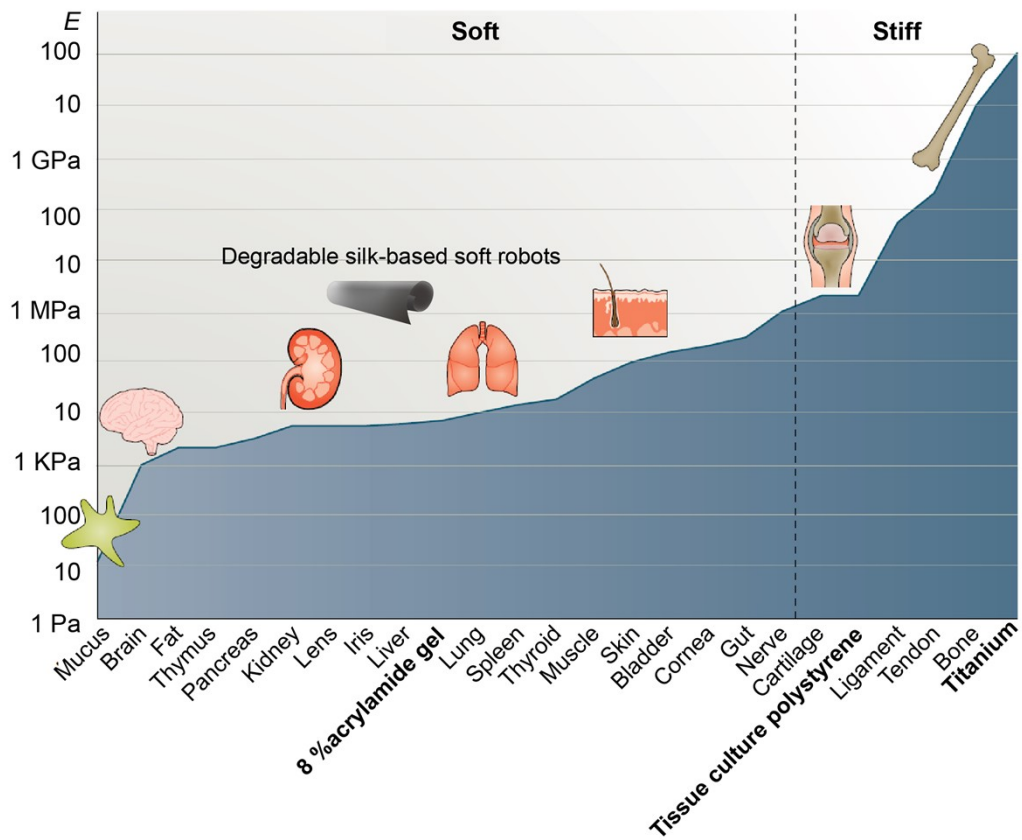

**Fig. S3** The summary of Young's moduli ( $E$ ) of different tissues and degradable silk-based soft robots fabricated in this study. Reproduced with permission.<sup>1</sup> Copyright 2020, Springer Nature.

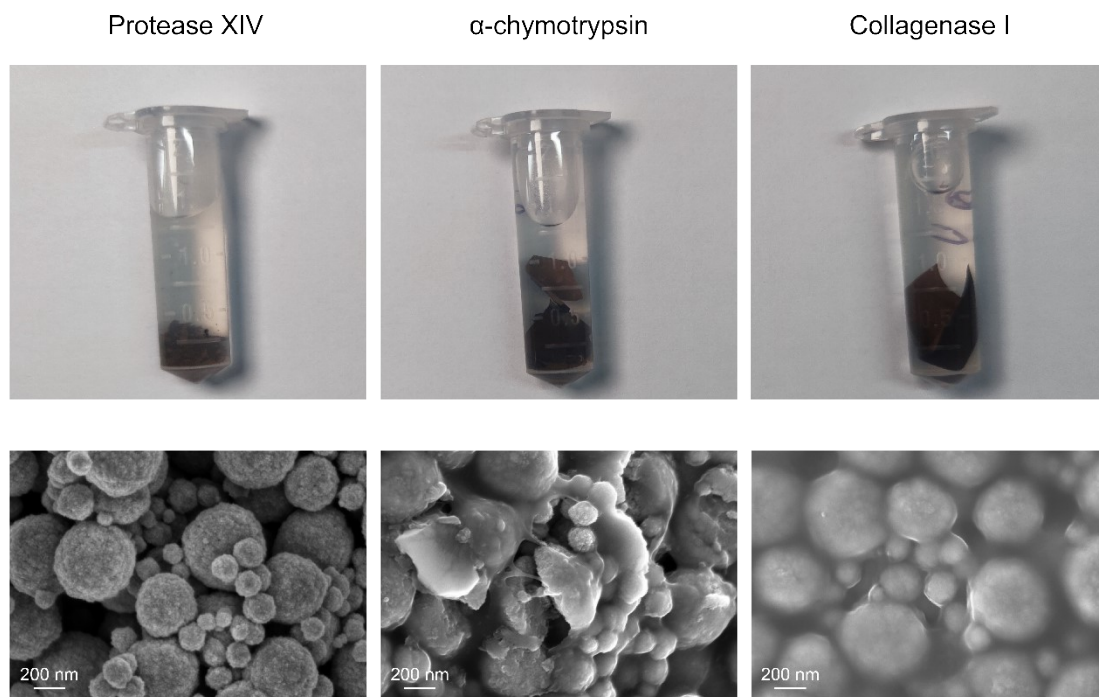

**Fig. S4** The photographs and SEM images of magnetic silk films after incubating in protease XIV,  $\alpha$ -chymotrypsin, and collagenase I for 3 days.

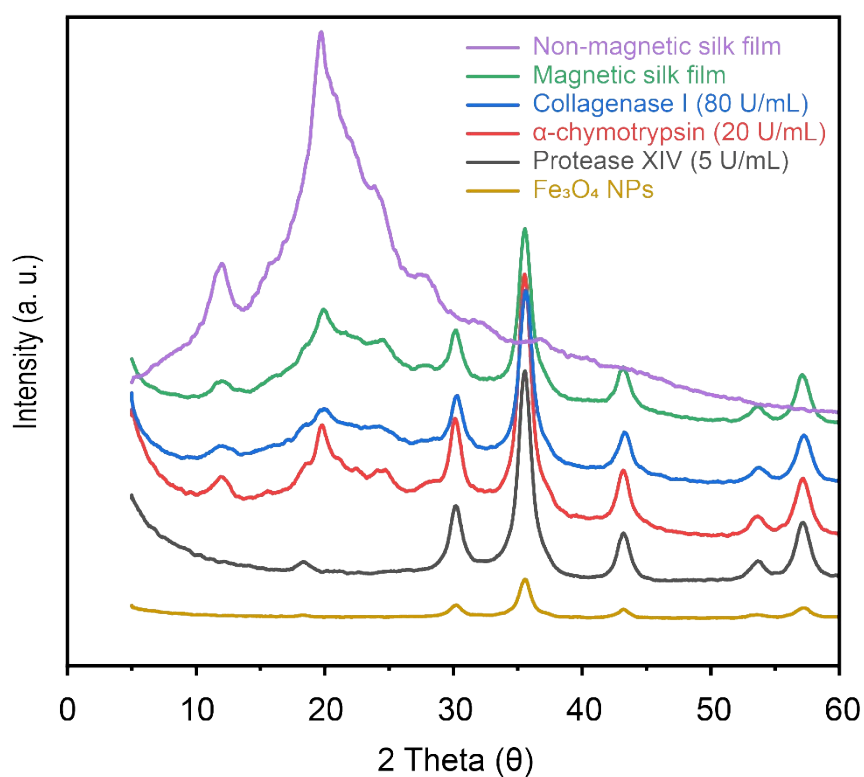

**Fig. S5** The XRD patterns of non-magnetic silk film, magnetic silk film and magnetic silk films after incubating in protease XIV,  $\alpha$ -chymotrypsin, and collagenase I for 3 days.

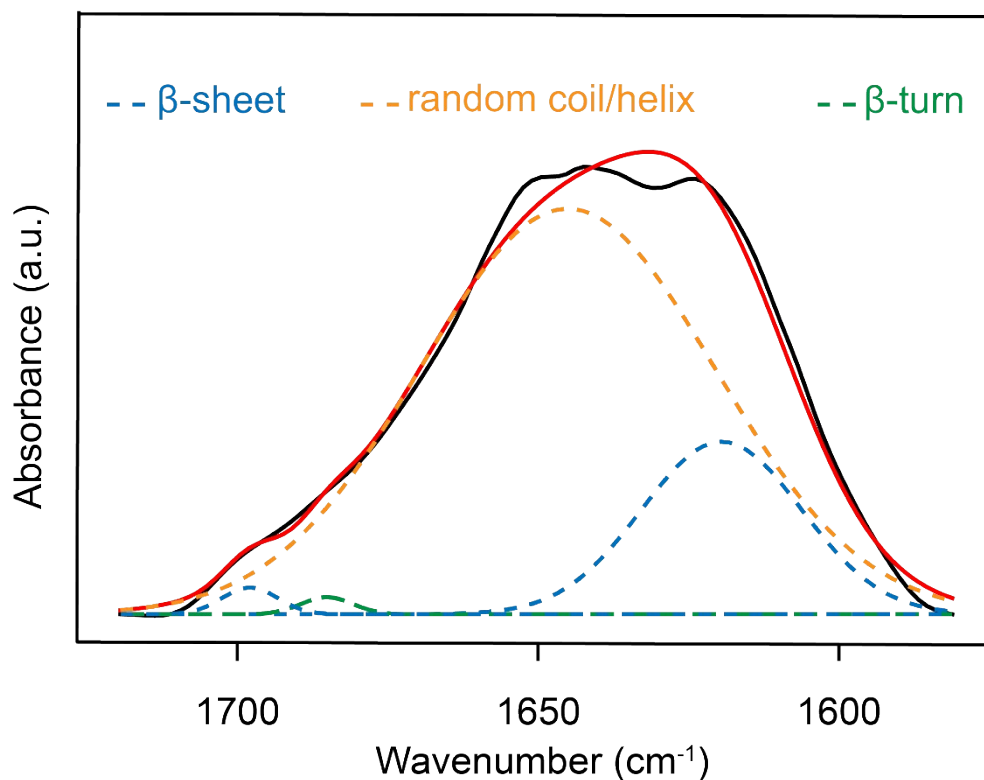

Fig. S6 FTIR spectrum of the welded magnetic silk film.

Table S1. Summary of the mechanical properties of the silk films

|                                | Magnetic silk film (dry) | Non-magnetic silk film (dry) | Magnetic silk film (wet) | Non-magnetic silk film (wet) |
|--------------------------------|--------------------------|------------------------------|--------------------------|------------------------------|
| Ultimate strength (MPa)        | 14.3 ± 1.9               | 13.4 ± 1.5                   | 1.88 ± 0.23              | 1.65 ± 0.20                  |
| Strain at failure (%)          | 154 ± 24                 | 165 ± 26                     | 224 ± 14                 | 454 ± 84                     |
| Young' modulus (MPa)           | 195.7 ± 53.1             | 324.3 ± 69.5                 | 4.89 ± 0.69              | 2.34 ± 0.33                  |
| Toughness (MJ/m <sup>3</sup> ) | 20.1 ± 5.1               | 20.3 ± 3.5                   | 3.23 ± 0.33              | 5.27 ± 1.30                  |

## Reference

1. Guimarães, C.F., Gasperini, L., Marques, A.P. et al. The stiffness of living tissues and its implications for tissue engineering. *Nat. Rev. Mater.* **5**, 351–370 (2020).
